# Supplementary material for: Factors Associated with Intention to Use Digital Mental Health Interventions Among AANHPI Emerging Adults in the United States: Application of the Seeking Mental Health Care Model
Source: Research Square preprint supplement (doi:10.21203/rs.3.rs-9285173/v1), 2026-04-24
Supplement: Supplementary file 1 [file 27eb62d84dfe6d0b90ca717d.docx]

**SUPPLEMENTAL MATERIALS**

**Table 3. Sensitivity Analyses: Main regression model with Model excluding Vendor 3**

|  | **Main analysis (N = 1577)** | | | | | **Excluding Vendor 3 (n = 1203)** | | | | |
| --- | --- | --- | --- | --- | --- | --- | --- | --- | --- | --- |
|  | **OR** | **SE** | **p** | **95% CI** | | **OR** | **SE** | **p** | **95% CI** | |
| **DV: Intention to use DMHI** |  |  |  | LL | UL |  |  |  | LL | UL |
| **Perceived Need** | 1.91 | 0.26 | 0.000 | 1.46 | 2.50 | 1.72 | 0.25 | 0.000 | 1.29 | 2.28 |
| **Mental health literacy score** | 1.14 | 0.04 | 0.000 | 1.06 | 1.21 | 1.09 | 0.04 | 0.015 | 1.02 | 1.16 |
| **Self-stigma** | 1.31 | 0.19 | 0.064 | 0.98 | 1.74 | 1.24 | 0.18 | 0.149 | 0.93 | 1.65 |
| **Public stigma** | 0.63 | 0.10 | 0.002 | 0.46 | 0.84 | 0.67 | 0.10 | 0.010 | 0.50 | 0.91 |
| **Anxiety score** | 0.99 | 0.02 | 0.745 | 0.96 | 1.03 | 0.99 | 0.02 | 0.573 | 0.96 | 1.02 |
| **Depression score** | 1.01 | 0.01 | 0.432 | 0.98 | 1.04 | 1.00 | 0.01 | 0.795 | 0.97 | 1.03 |
| **Sex (F)** | 1.13 | 0.15 | 0.358 | 0.87 | 1.45 | 1.28 | 0.17 | 0.054 | 1.00 | 1.66 |
| **Age** | 1.05 | 0.02 | 0.015 | 1.01 | 1.09 | 1.05 | 0.02 | 0.011 | 1.01 | 1.10 |
| **College degree or higher** | 1.35 | 0.19 | 0.032 | 1.03 | 1.78 | 1.29 | 0.18 | 0.075 | 0.98 | 1.70 |
| **Currently working** | 0.90 | 0.12 | 0.397 | 0.70 | 1.15 | 0.87 | 0.11 | 0.302 | 0.68 | 1.13 |
| **Insured** | 1.71 | 0.37 | 0.012 | 1.13 | 2.61 | 1.58 | 0.34 | 0.032 | 1.04 | 2.40 |
| **High acculturation** | 1.43 | 0.18 | 0.004 | 1.12 | 1.84 | 1.21 | 0.16 | 0.139 | 0.94 | 1.56 |
| **Currently in therapy** | 2.19 | 0.35 | 0.000 | 1.59 | 3.00 | 2.17 | 0.37 | 0.000 | 1.56 | 3.02 |
| **Vendor (Vendor 1 comparison)** |  |  |  |  |  |  |  |  |  |  |
| *Vendor 2* | 0.88 | 0.11 | 0.323 | 0.68 | 1.13 |  |  |  |  |  |
| *Vendor 3* | 3.97 | 1.08 | 0.000 | 2.33 | 6.76 |  |  |  |  |  |
| **Ethnicity (Chinese comparison)** |  |  |  |  |  |  |  |  |  |  |
| *Filipino* | 1.75 | 0.41 | 0.016 | 1.11 | 2.76 | 1.73 | 0.40 | 0.018 | 1.10 | 2.72 |
| *Indian* | 1.78 | 0.39 | 0.009 | 1.15 | 2.73 | 1.94 | 0.43 | 0.003 | 1.26 | 3.00 |
| *Japanese* | 3.37 | 1.16 | 0.000 | 1.71 | 6.62 | 2.11 | 0.82 | 0.055 | 0.98 | 4.53 |
| *Korean* | 0.98 | 0.26 | 0.933 | 0.58 | 1.65 | 0.76 | 0.22 | 0.336 | 0.43 | 1.33 |
| *NHPI* | 1.57 | 0.50 | 0.156 | 0.84 | 2.94 | 1.66 | 0.63 | 0.180 | 0.79 | 3.47 |
| *Vietnamese* | 1.15 | 0.28 | 0.566 | 0.72 | 1.84 | 1.12 | 0.27 | 0.642 | 0.70 | 1.80 |
| *Other* | 1.72 | 0.42 | 0.026 | 1.07 | 2.79 | 1.61 | 0.39 | 0.051 | 1.00 | 2.59 |
| *Multi-ethnic* | 0.77 | 0.26 | 0.453 | 0.40 | 1.51 | 0.81 | 0.28 | 0.537 | 0.42 | 1.58 |
| *Multi-racial AANHPI* | 1.12 | 0.25 | 0.632 | 0.71 | 1.74 | 1.18 | 0.27 | 0.457 | 0.76 | 1.84 |
| **constant** | 0.04 | 0.03 | 0.000 | 0.01 | 0.19 | 0.06 | 0.05 | 0.000 | 0.01 | 0.28 |
|  |  |  |  |  |  |  |  |  |  |  |
|  | Model chi-square (28) = 463.52, p < .001 | | | | | Model chi-square (22) = 125.80, p < .001 | | | | |
|  | Pseudo R-square = 0.22 | | | | | Pseudo R-square = 0.08 | | | | |
